# Supplementary material
Source: PubMed Central journal article supplement (PMC4243058)

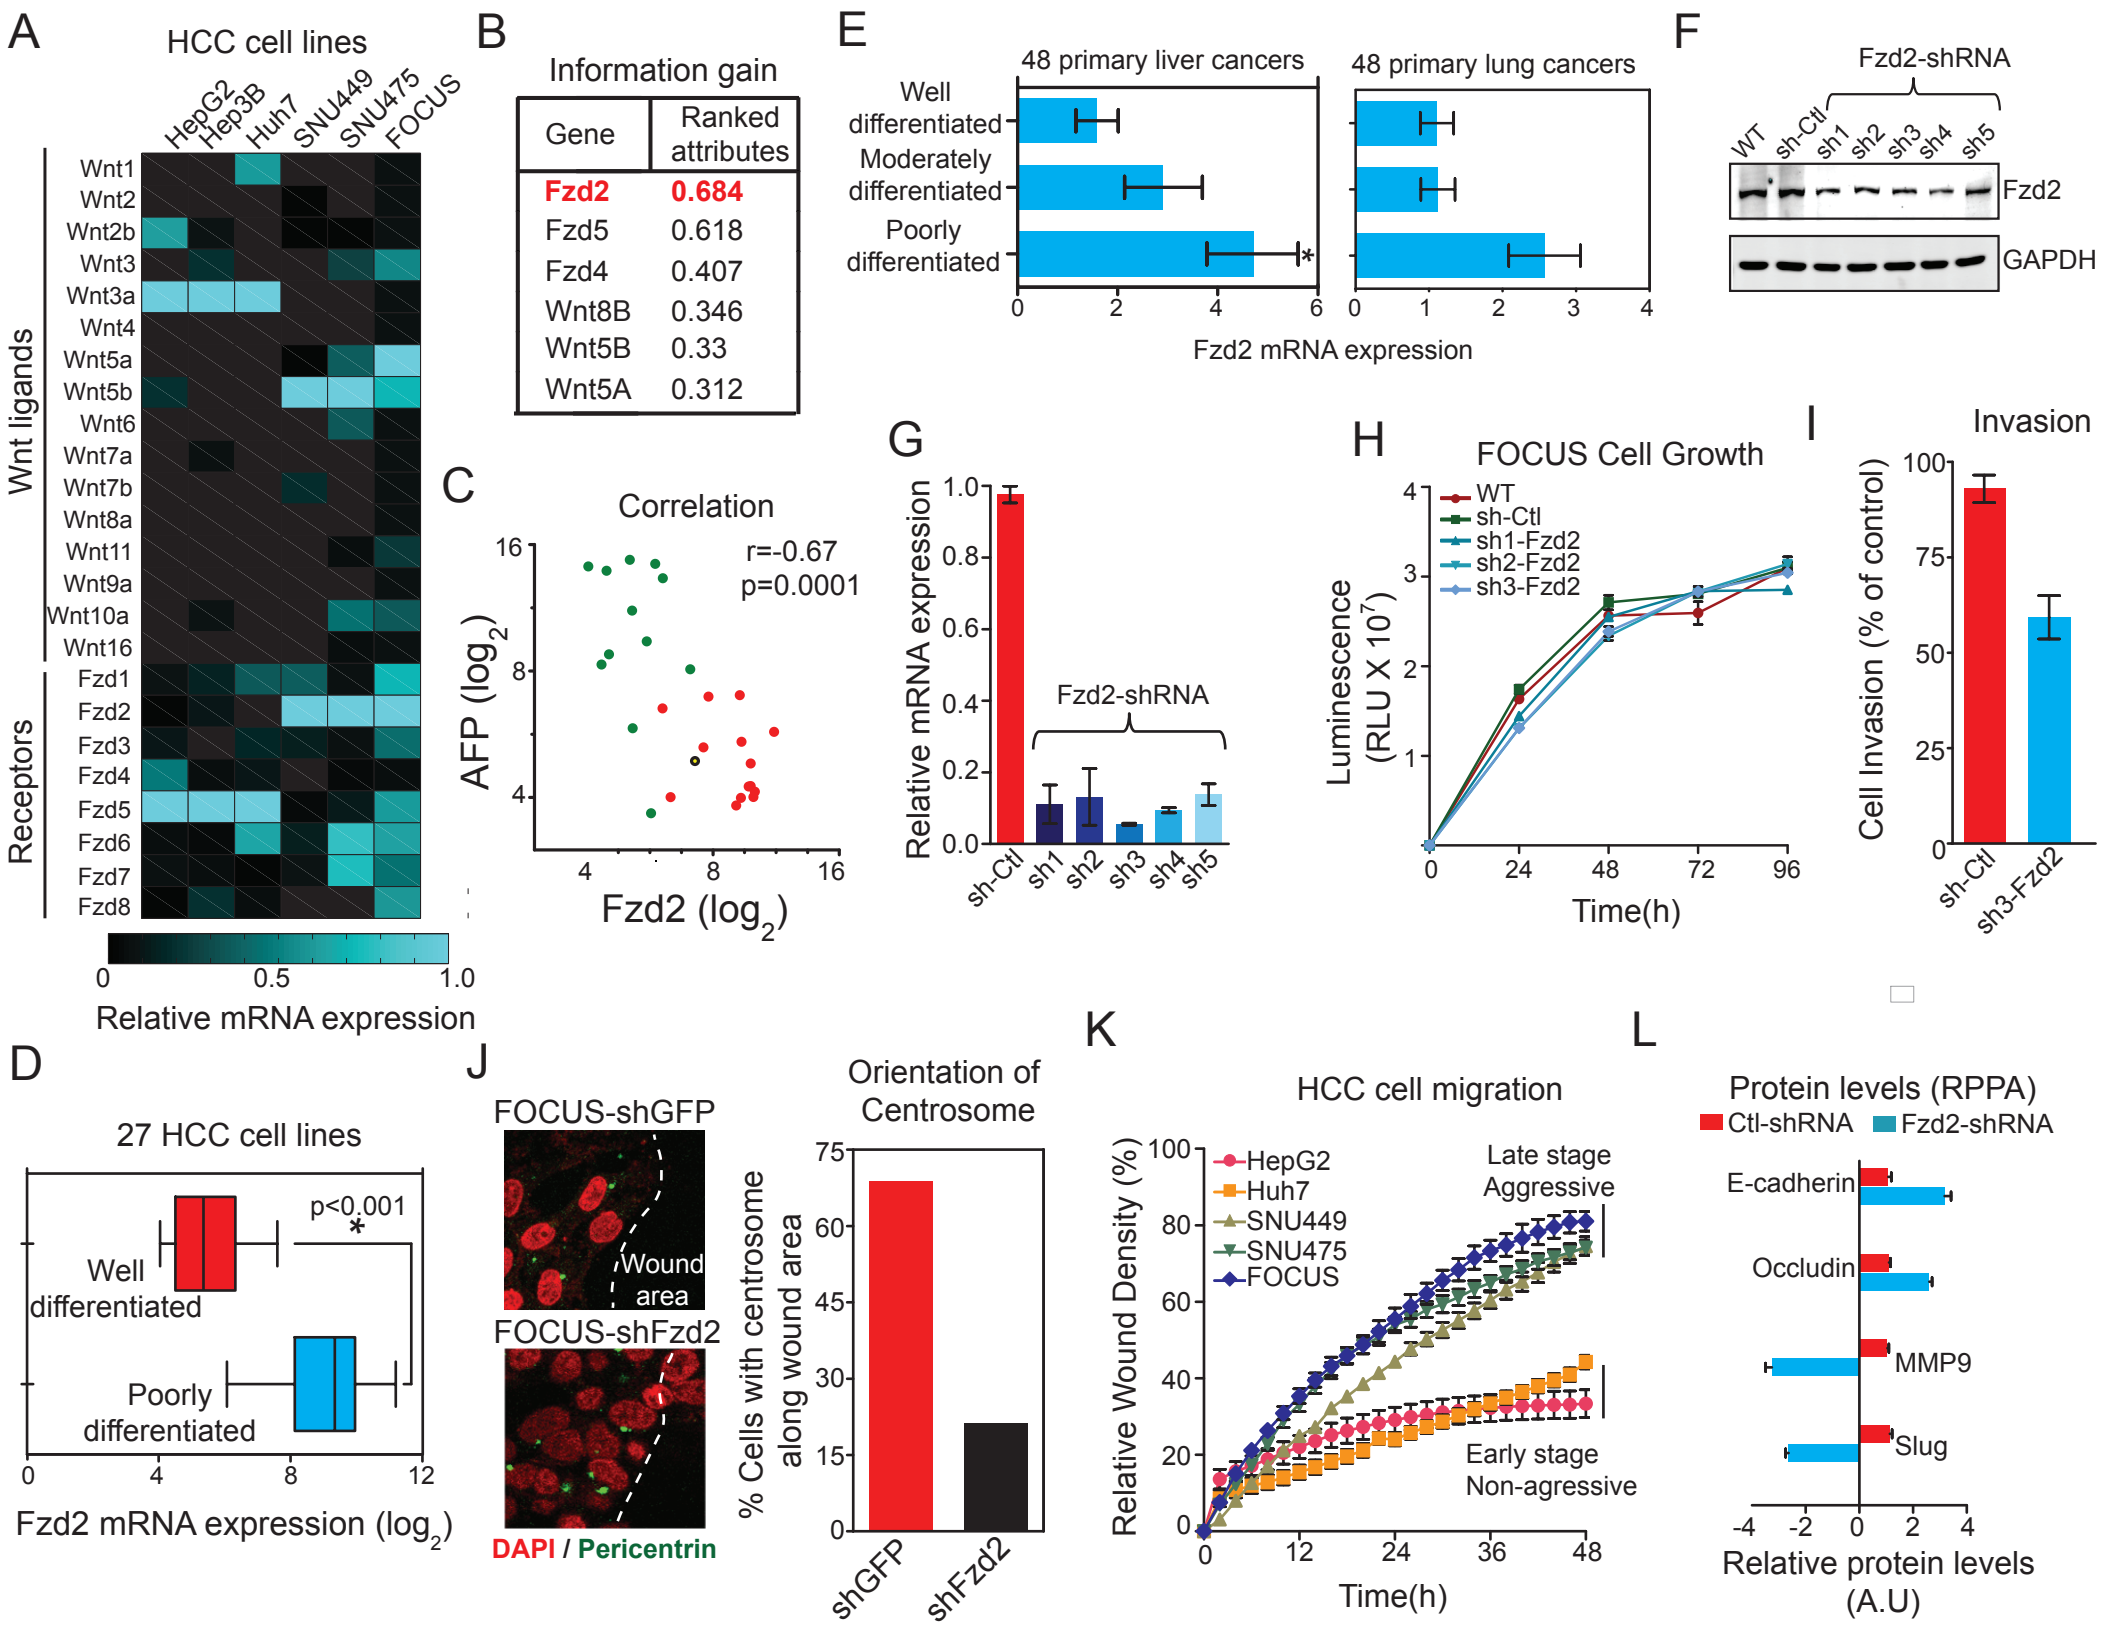

Supplement: NIHMS639659-supplement-1.pdf [file NIHMS639659-supplement-1.pdf]

**A**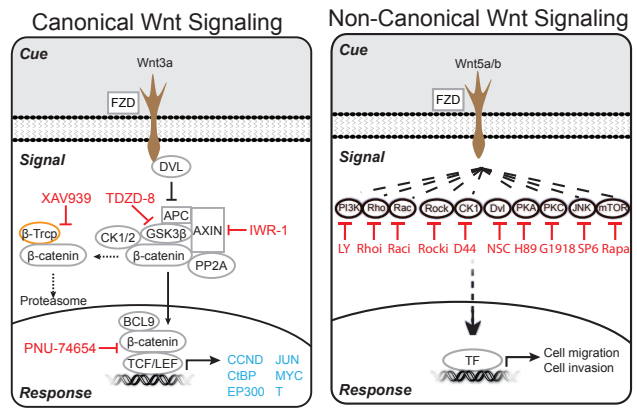**B**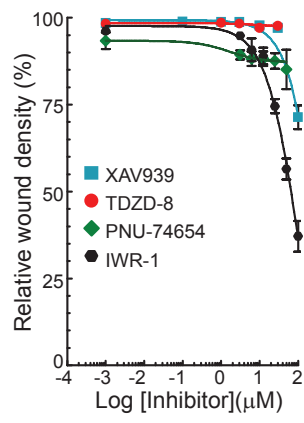**C**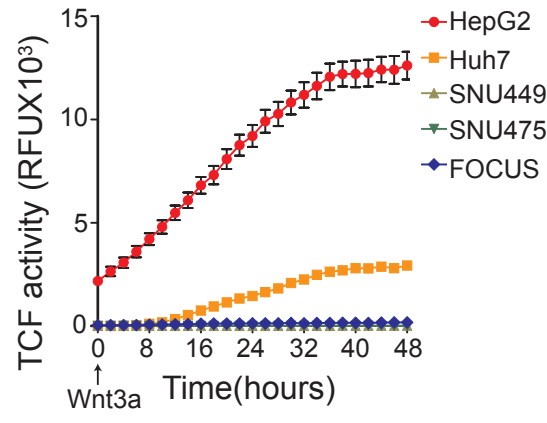**D**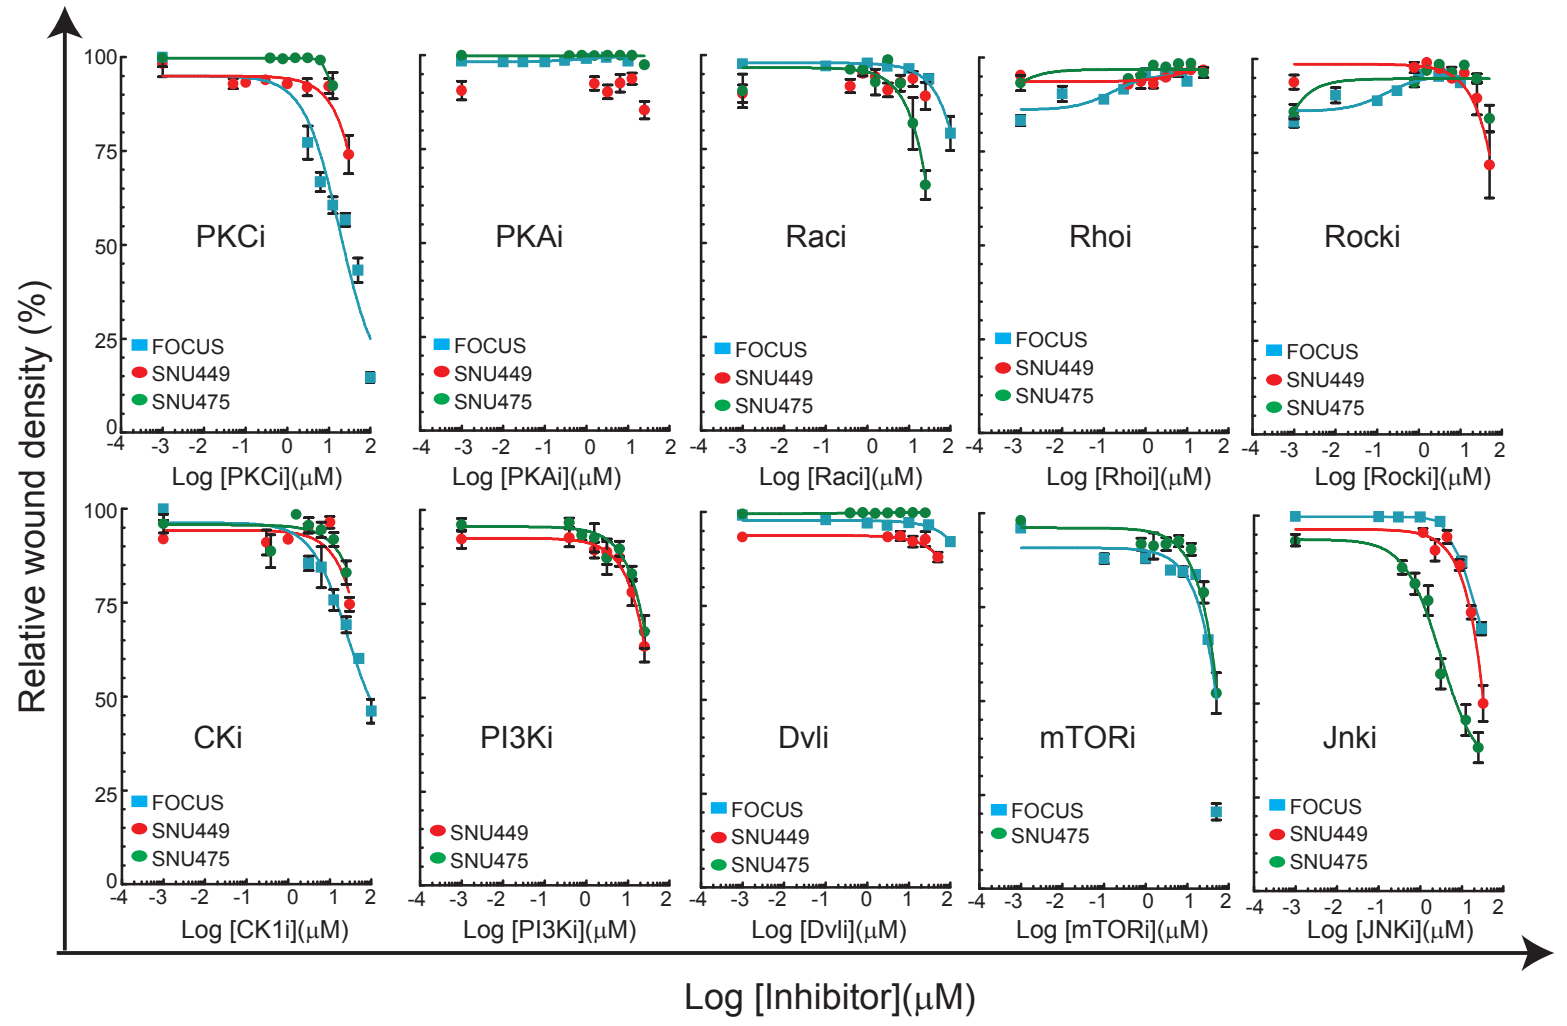

Supplement: NIHMS639659-supplement-2.pdf [file NIHMS639659-supplement-2.pdf]

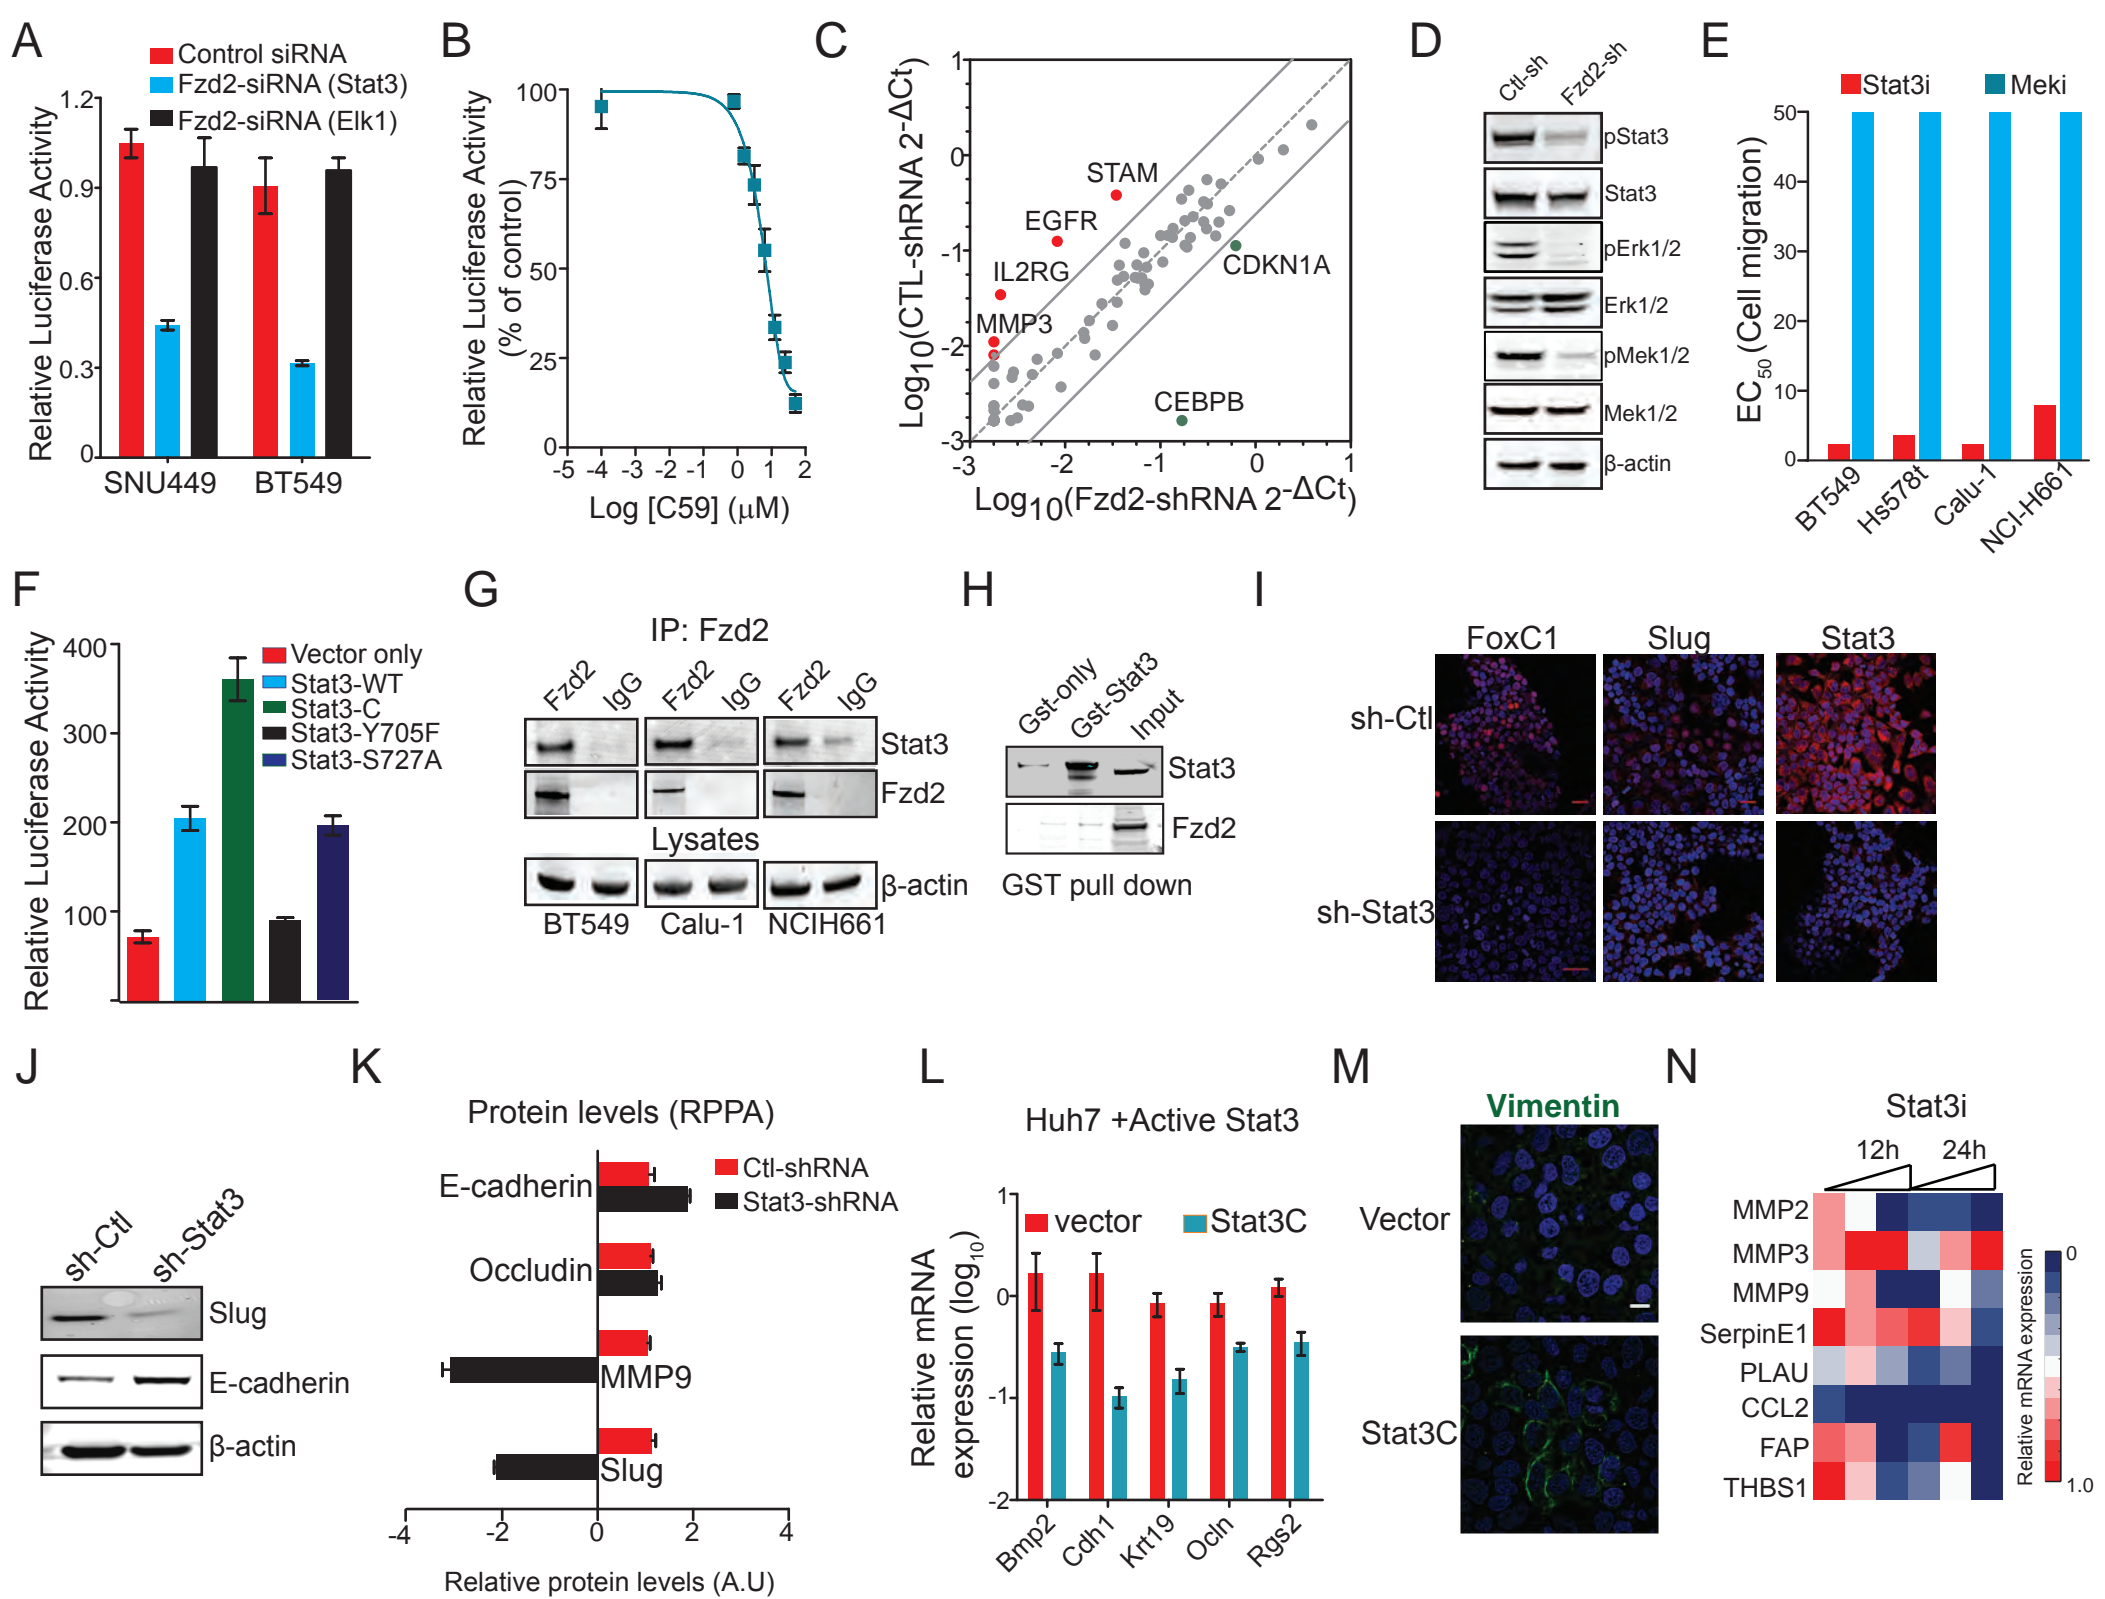

Supplement: NIHMS639659-supplement-3.pdf [file NIHMS639659-supplement-3.pdf]

A

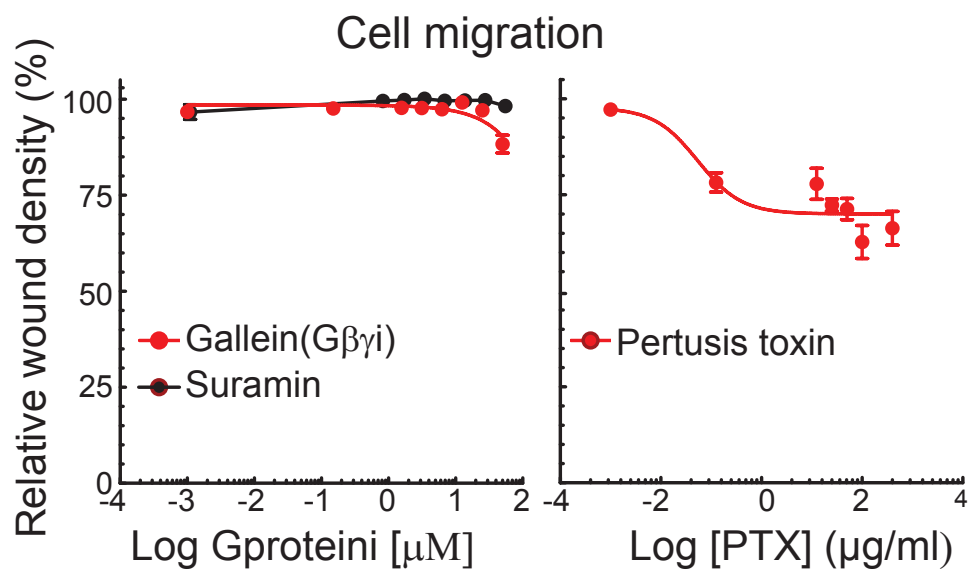

B

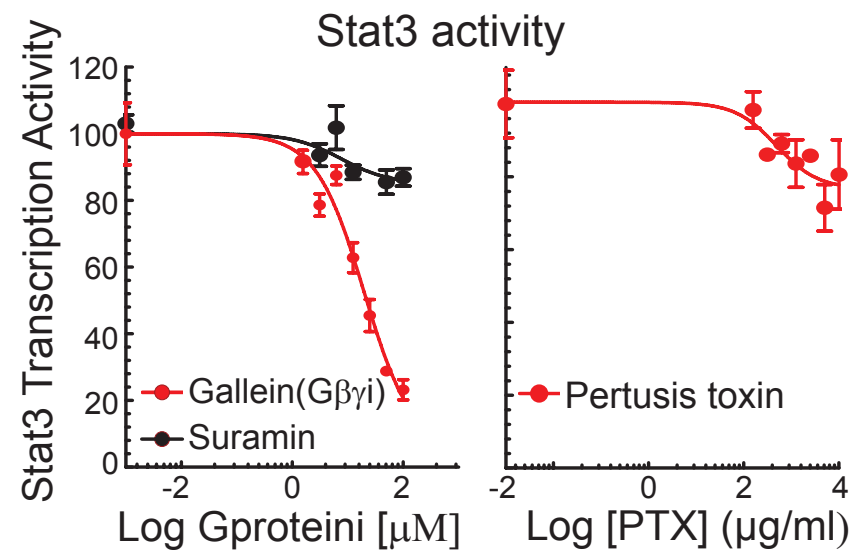

C

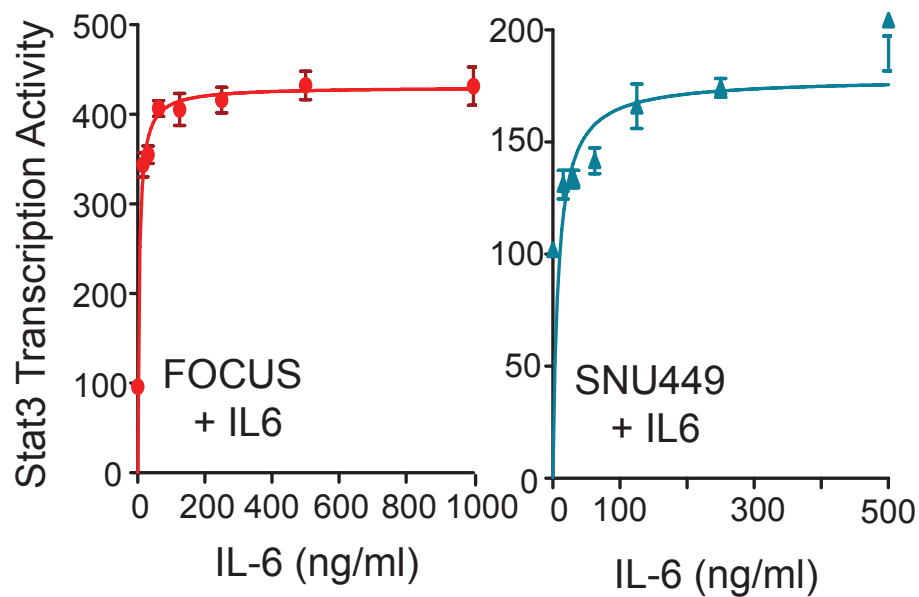

D

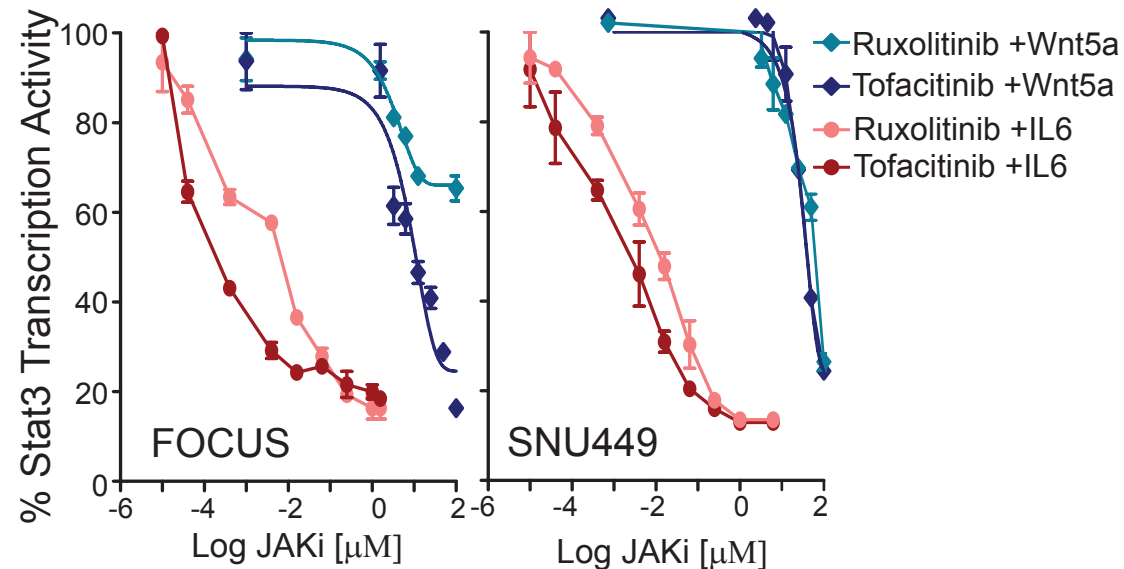

Supplement: NIHMS639659-supplement-4.pdf [file NIHMS639659-supplement-4.pdf]

A

## Protein Phosphorylation

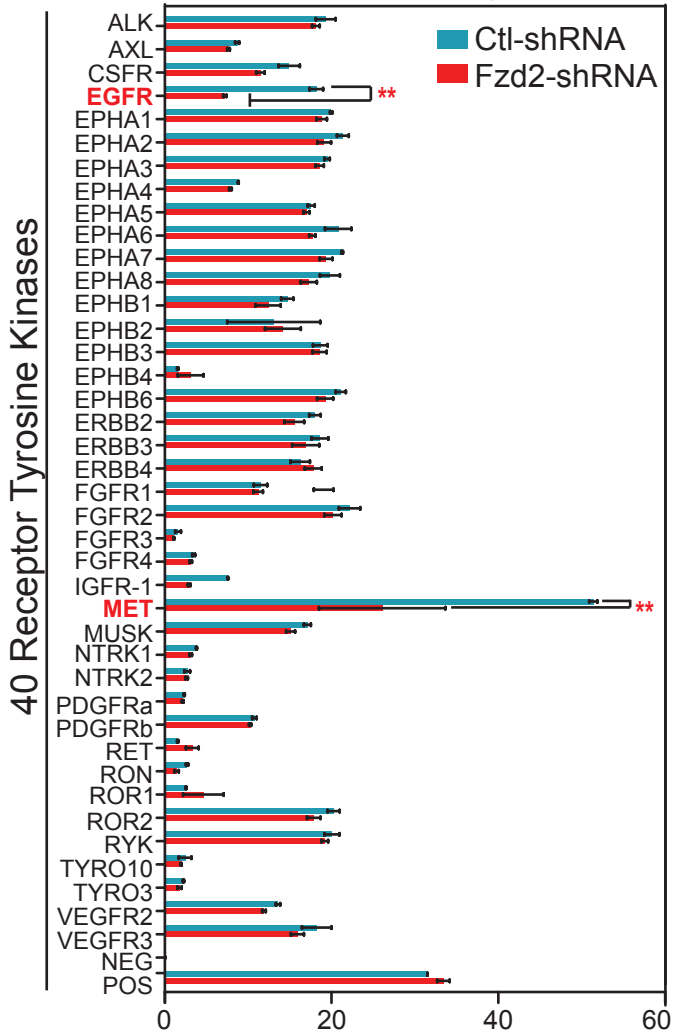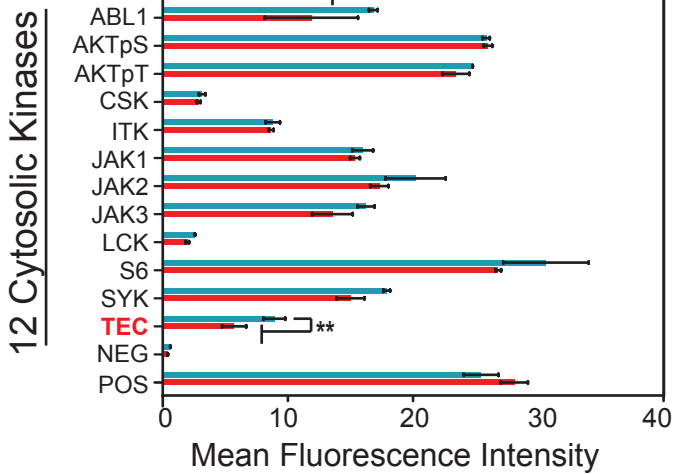

B

## Protein Expression

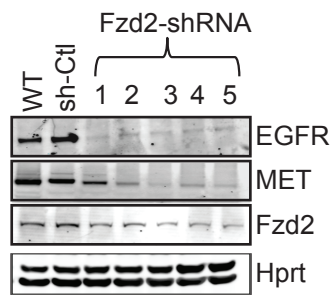

C

## mRNA Expression

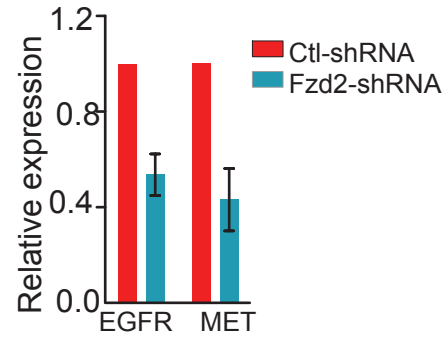

D

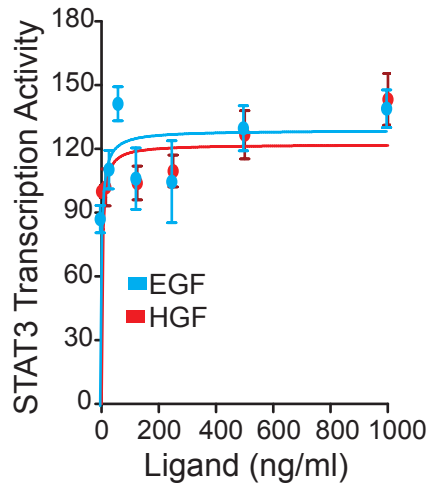

E

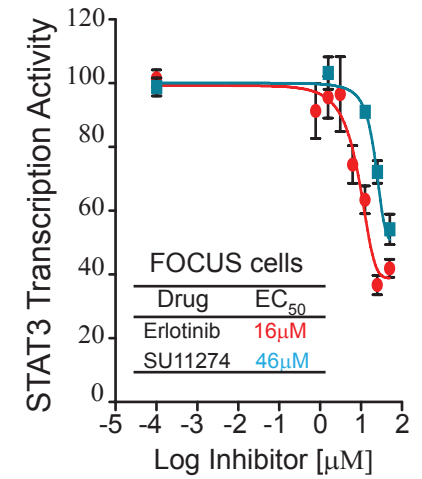

F

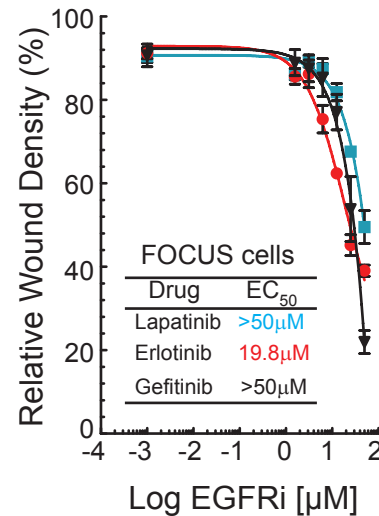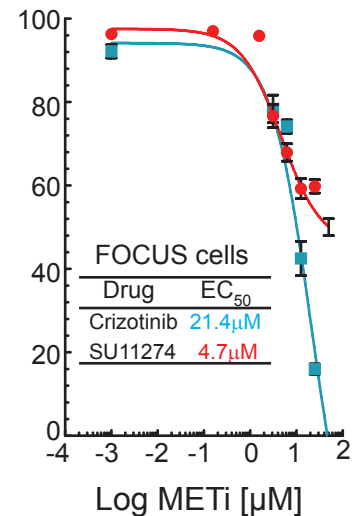

Supplement: NIHMS639659-supplement-5.pdf [file NIHMS639659-supplement-5.pdf]

**A****Kinome Regularization**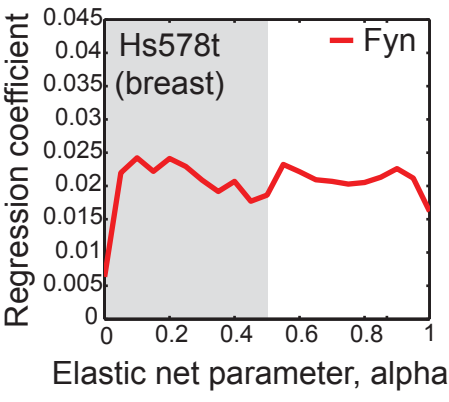**B**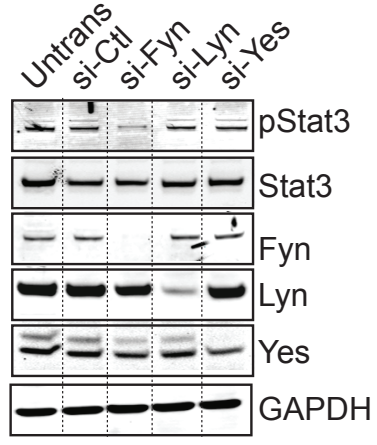**C**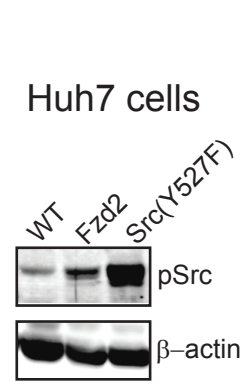**D**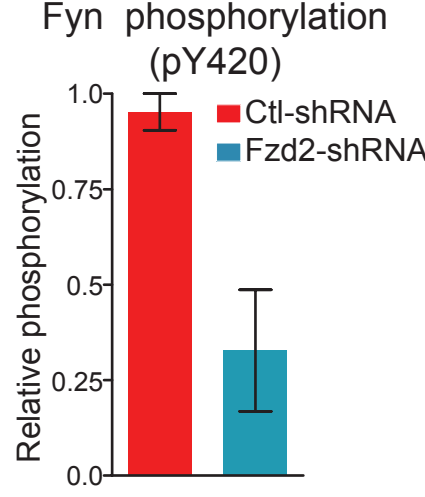**E**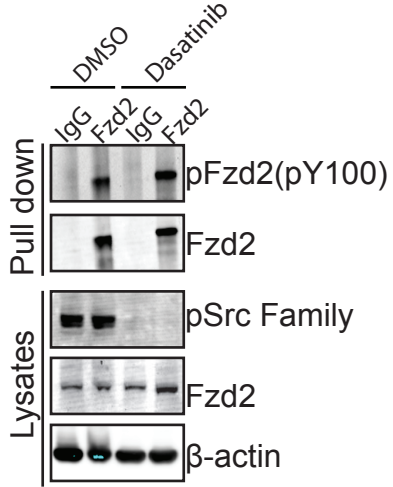**F**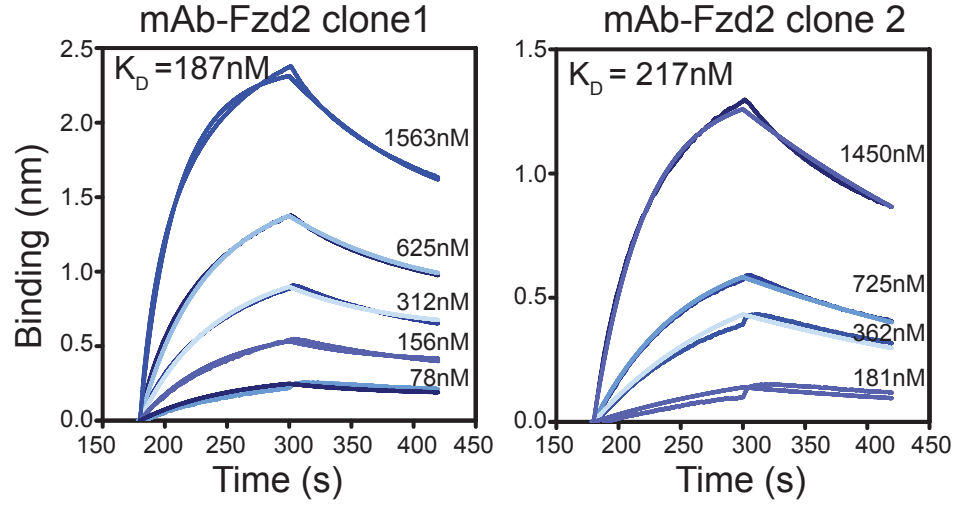**G**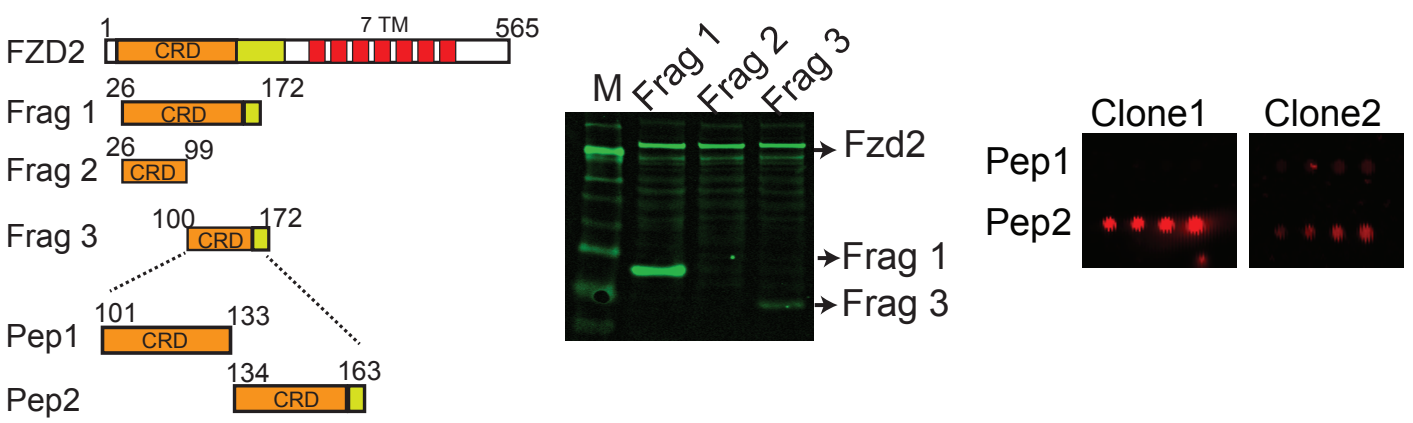

Supplement: NIHMS639659-supplement-6.pdf [file NIHMS639659-supplement-6.pdf]

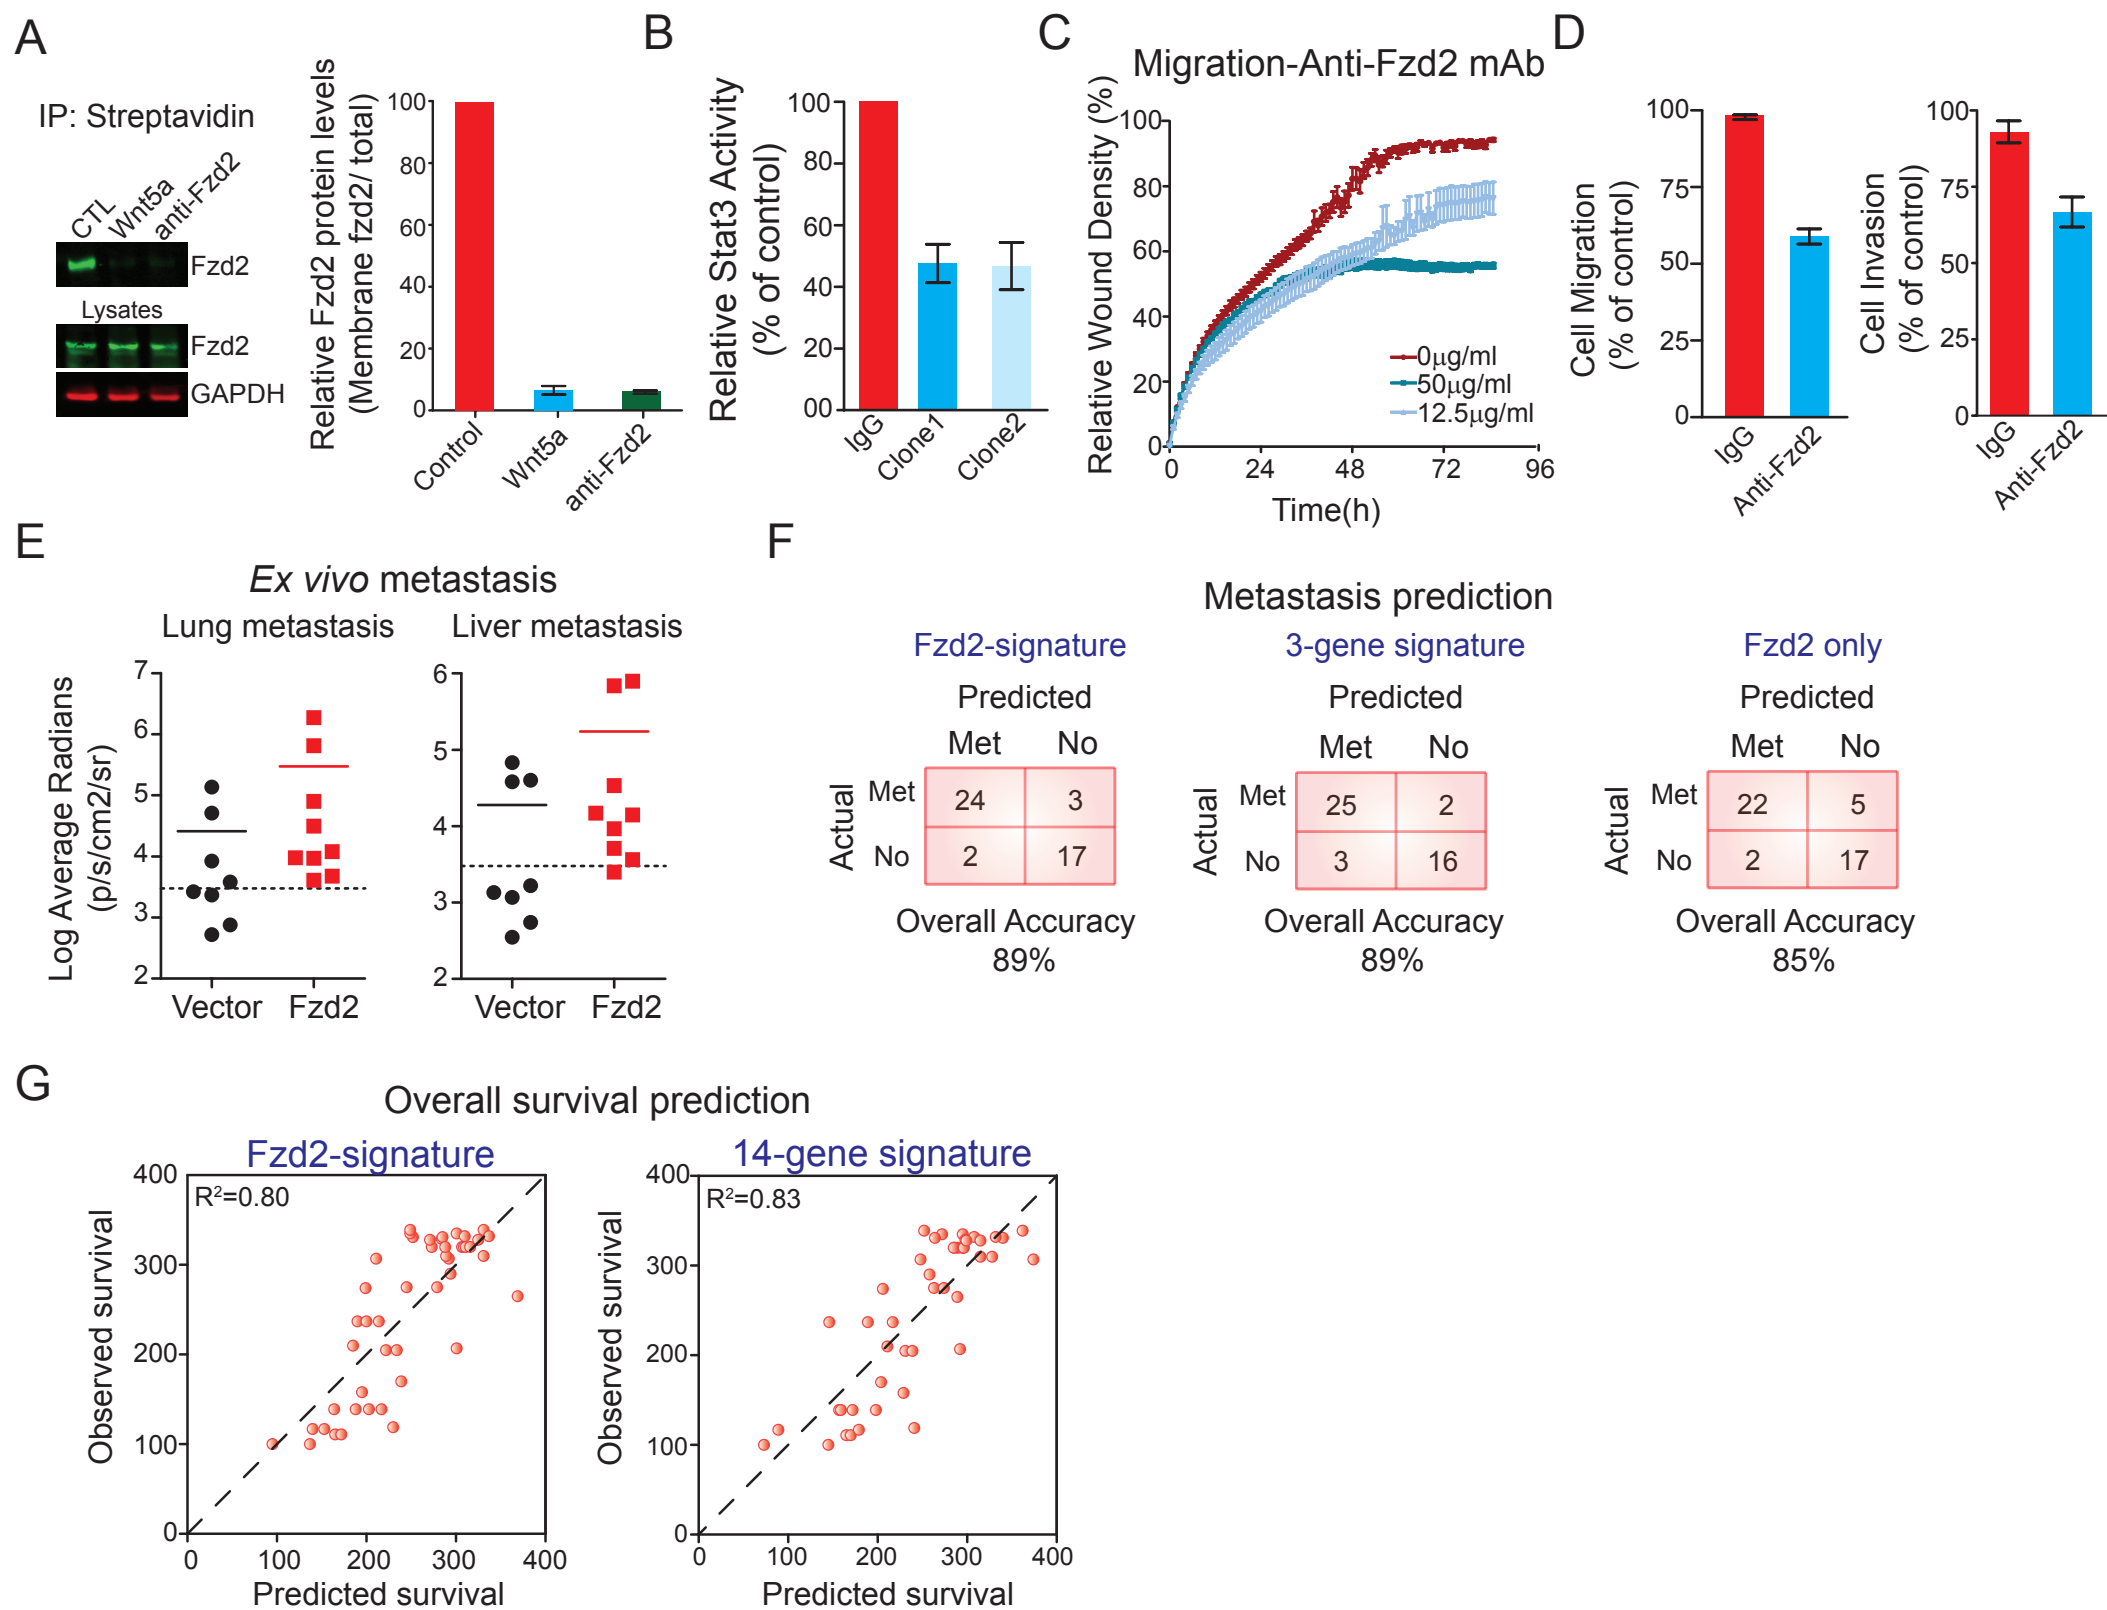

Supplement: NIHMS639659-supplement-7.pdf [file NIHMS639659-supplement-7.pdf]
